# Supplementary material
Source: publisher figshare collection journal article supplement (https://karger.figshare.com/ndownloader/files/12833204)
Supplement: Supplementary file 1 [file 12833204]

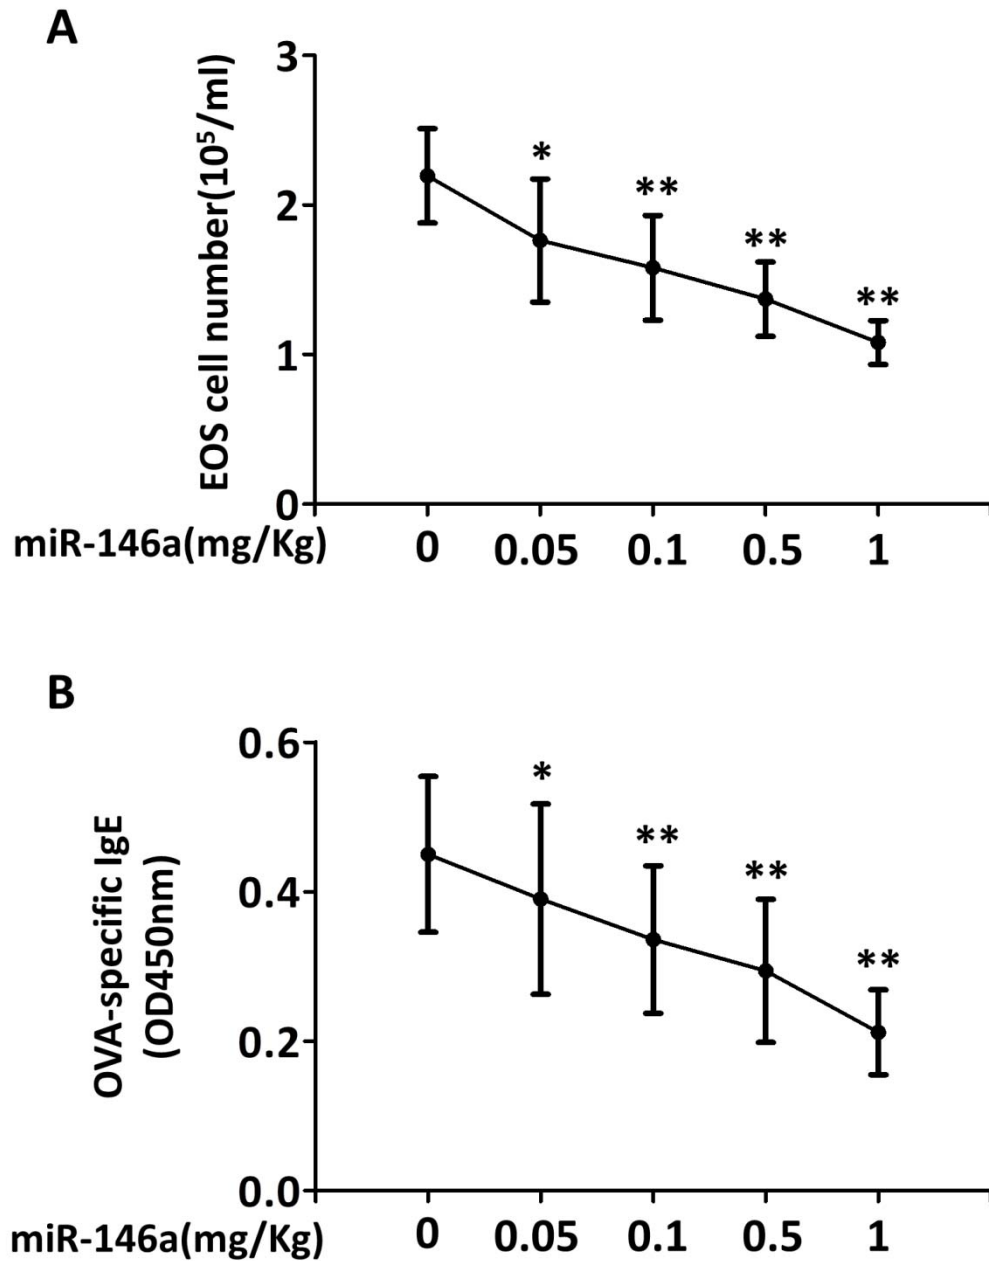

**Fig. S1.** The dose-response curve of miR-146a mimics in OVA mice. (A) Effect of miR-146a mimics with different doses on recruitment of eosinophils in BALF. (B) Effect of miR-146a mimics with different doses on the levels of OVA-specific IgE in serum. Serum and BALF were collected 24 h after the last challenge. The levels of OVA-specific IgE were quantified by ELISA. Data are presented as mean  $\pm$  SEM values. N=5 mice, \* $p < 0.05$ ; \*\* $p < 0.01$  versus the 0 mg/Kg group.
